# Supplementary material
Source: publisher site journal article supplement (https://www.dovepress.com/article/233483)
Supplement: Supplementary file 1 [file get_supplementary_file.php]

**Appendix A**

**Government documents list**

| **Relevant implementation standards and planning guidelines issued by the state** | China’s medium- and long-term plans for the prevention and treatment of chronic diseases (2017–2025) |
| --- | --- |
| National Health City Evaluation Index System (2018 edition) | “13th Five-Year” Plan for Healthy Aging |
| Health City Evaluation Index System (Draft for Comment) | The “13th Five-Year” Plan for Healthy Aging Key Tasks |
| “Healthy China 2030” Plan | National Nutrition Plan 2017–2030 |
| National Occupational Disease Prevention and Control Plan (2016–2020) | National Health Literacy Promotion Action Plan (2014–2020) |
| Opinions of the General Office of the State Council on Further Strengthening Vaccine Circulation and Vaccination Management | Guiding Opinions on Strengthening Health Promotion and Education |
| Chinese Medicine Health Service Development Plan (2015–2020) | National Hygienic City Standards (2014 edition) |
| “13th Five-Year” Plan for the Prevention and Treatment of Acute Infectious Diseases (2016–2020) | **Health related documents in Chongqing and other cities:** |
| “13th Five-Year” Plan for National Tuberculosis Prevention and Control | “Healthy Chongqing 2030” Plan |
| Health Community/Health Village Evaluation Reference Standard (2016 edition) | Chongqing City National Health Literacy Promotion Action Implementation Plan |
| Healthy Family Reference Standard (2016 edition) | Administrative Measures for the Construction of Chongqing Comprehensive Prevention and Control Demonstration Zone for Chronic Diseases |
| Health Promotion Hospital Evaluation Reference Standard (2016 edition) | Chongqing Health and Family Planning “13th Five-Year” Plan |
| Health Promotion School Evaluation Reference Standard (2016 edition) | Chongqing Sports Development “13th Five-Year” Plan |
| Health Promotion Agency Evaluation Reference Standard (2016 edition) | Chongqing Ecological Civilization “13th Five-Year” Plan |
| Health Promotion Enterprise Evaluation Reference Standard (2016 edition) | “Healthy Nan’an 2030” Plan |
| “13th Five-Year” Plan for Health and Wellness | Beijing Municipality Controlling Smoking Regulations |
| Work Guide of Health and Family Planning Grassroots Institutions for Food Safety | Western Health Action-Chongqing Health Baseline Survey Report |
| National Health Service System Plan (2015–2020) | “Healthy Beijing 2030” Plan |

**Appendix B**

**Suggestions of experts from the first round of focus group discussions**

| **Key points** | **Detailed suggestions and opinions** |
| --- | --- |
| The indicator framework should be fully integrated with other national policies and must contain additional extensive contents. | 1. The indicators should fully integrate the contents of the “Healthy Chongqing 2030” Plan and the 19th Session of the National Congress of the communist party of China. Furthermore, such indicators must be combined with the current tasks of related departments. |
|  | 2. These essential indicators in the following aspects should be considered: chronic diseases, food and drugs, the integration of Chinese traditional and Western medicine, health industry, and combination of medical and health care. |
| The classification of indicators should be accurate. | 1. Sports-related indicators are recommended to be included in just one category. |
|  | 2. AIDS management belongs to health service rather than healthy people. |
|  | 3. The classifications of second-level indicators of health services are scattered, certain classifications could merge together. |
| Use objective indicators mostly. | 1. The number of psychiatric practitioners (assistant physicians) per 100,000 people is more objective than the management rate of patients with severe mental disorders, selecting the former is better. |
|  | 2. Management number of hypertension/diabetes patients is less objective relative to the standardized management rate of hypertension/diabetes patients; the latter is better for assessing chronic disease management. |
|  | 3. Certain subjective indicators are not recommended: Community construction 15-min fitness circle, institutions, enterprises, and institutions to carry out workplace fitness activities, organize fitness and competition activities in line with the characteristics of the unit. |
|  | 4. Is it more objective to evaluate the smoking situation through the tobacco sale volume than the smoking rate? |
| Deletion of indicators | 1. The health certificate is issued only after one passes the medical examination. Hence, choosing the coverage rate of the health certificate is better than the compliance rate of the physical examination for the food and beverage practitioners. |
|  | 2. The use rate of antibiotics is a sampling indicator instead of a perennial monitoring indicator for hospital assessment; hence such a rate may be excluded. |
|  | 3. Sports Bureau and Education Commission: For the sake of safety, the free or low-cost open rate of public sports venues, partial enterprises and school sports venues is not recommended to include. |
|  | 4. Unnecessary indicators: The overall rate of reporting tuberculosis patients and suspected tuberculosis patients, the ratio of education expenditure to GDP in local finance, successful treatment rate for tuberculosis patients, and the coverage rate of harmless sanitary toilets (rural). |
|  | 5. Selecting one of the water-quality compliance rates for centralized drinking in water source areas and the qualified rate of drinking water quality is advised. |
| Other Suggestions | 1. The total number of recommended indicators should not exceed 80. The departments may not be well-coordinated if the indicators are too miscellaneous. |

**Appendix C**

**Advice from interviewees of in-depth interviews**

| **Key points** | **Detailed suggestions and opinions** |
| --- | --- |
| Deletion of indicators | 1. No statistical data in practical work: the development rate of students’ health behavior, utilization rate of community health services, pesticide residues, residues of veterinary drugs, limit of additives, medical insurance hospitalization expense reimbursement ratio, the substitution rate of the minimum living security standard account in consumption expenditure, regular health checkup rates of employees, overall 5-year survival rate of cancer, total fertility rate, number of health trails per 10,000 people, popular opinion indicators, and ratio of urban and rural residents who have passed the “National Physique Determination Standards”. |
|  | 3. Considering the discrimination of gender is rare in the urban area, the sex ratio could be deleted. |
|  | 4. “Gross enrolment ratio in high school”: the target population is not fixed because of the migration, so obtaining an indicator value greater than 100% is possible. This indicator may be deleted. |
|  | 5. “The management rate of children of migrant workers is included in the locally planned immunization program”. The population mobility is very large and most residents attach great importance to children’s vaccination, so this indicator could be deleted from the system indicator. |
|  | 6. The “pass rate of cosmetic inspection sampling” can be deleted, because it’s not related to health closely. |
|  | 7. “Compliance rate of pedestrian and bicycle transportation system construction”: Chongqing is known as a mountain city, so the bicycle is an uncommon and unsuitable transport for this city. |
|  | 8. For the vaccination, the most important one is the immunization planning vaccination rate; the others are not necessary. |
|  | 9. “Carry out the construction of supporting facilities, such as healthy canteens, restaurants/hotels, health theme parks, health huts, and health streets.” This is totally a qualitative indicator and is, therefore, subjective. |
|  | 10. “Compliance rate of National Student Physical Health Standard” is more commonly used in practical work compared with the “Excellent Rate of Student Physique Monitoring”; thus the former is chosen. |
|  | 11. “Student regular physical examination rate” includes vision, dental caries, otolaryngology, and other physiological items; selecting the next level detailed indicator instead of the integrated indicator is advised. |
|  | 12. The Healthy City emphasizes primary health services; thus, selecting the indicator of general practitioners instead of the practicing (assistant) physicians is advised. (Note: the former is the health service provider of primary health services) |
|  | 13. Health care expenditure that accounts for the proportion of fiscal expenditure is a reasonable indicator to reflect the government investment; other medical economic indicators are not necessary. |
| Consider to Supplement indicators | 1. Setting an indicator to monitor the configuration of full-time and part-time school doctors is advised. |
|  | 2. Supplementing the indicator “Trends in the incidence of cardiovascular and cerebrovascular events” is suggested. |
|  | 3. The most important target group for government medical assistance is the people who obtain the minimum living security and the extremely poor; thus, it is feasible to choose one from the total number of people/ total amount of government medical assistance among the people who obtain the minimum living security, the extremely poor or low-income people. |
|  | 4. Can the hospitalization rate be included in the indicator system, because if people are healthy, then they are less likely be hospitalized? Can this indicator reflect the level of health? |
|  | 5. The environmental factors affecting human health mainly include air, water, and soil quality. The indicator system has involved air and water-related indicators and such a indicator system could select the safe utilization rate of contaminated plots as the soil indicator. |
| The classifications of second-level indicators need adjustment. | 1. The classification of health service can refer to the classification of national basic public health services: health file management services, vaccination services, health management services for key populations, health management services for patients with chronic disease, and management services for patients with severe mental disorders. |
| Characteristic indicators | The number of massive (national and above) national fitness activities held annually could be considered as a characteristic indicator. |

**Appendix D**

**Recommendations from experts in the second round of focus group discussions**

| **Key points** | **Detailed suggestions and opinions** |
| --- | --- |
| Deleted indicators | 1. Deleting the following indicators is recommend due to the low feasibility: daily salt intake per capita and banning of smoking and tobacco advertising in all indoor public places, workplaces, and public transport. |
|  | 2. As the limited development of Healthy Cell Engineering, the coverage rates of healthy school, healthy community, and healthy enterprise may be deleted. |
|  | 3. “Configuration of full-time and part-time school doctors”: This indicator is unnecessary because many schools do not meet the requirements for the configuration of full-time school doctors (one school doctor per 600 students is required). The current proposal is that the school signs a contract with the health service center where it is located, and asks the doctors of the community health service center to perform the duties of the school doctor. |
|  | 4. “Hospitalization rate in local urban areas” cannot be calculated based on local data because of the constant migration of people in these areas. |
|  | 5. The definition of “contaminated plots” is not clear, so deleting “Safety utilization rate of contaminated plots” is recommended. |
| Supplementary/retained indicators | 1. Myopia is a serious public health concern in China. It is recommended to supplement one indicator of myopia rate of students. |
|  | 2. For the indicators of government medical assistance, the people who hold the minimum living security, which is judged by legal procedures are relatively stable, so keeping the indicators of the minimum living security group is recommended. |
| Classification of second-level indicator | 1. The second-level indicator “Culture and Education” is proposed to be changed to “Education.” |
| Characteristic indicators | 1. “Building of healthy venues” could be supplemented. |
|  | 2. “Health Science Popularization” is a local characteristic feature that could be included. The specific indicators are the times of health science popularization, the number of people gathered, and the number of LED viewings. |

**Appendix E**

**Final recommended list of Healthy City Indicators (HCI) and their definitions**

**HCI 1: Proportion of days with a good and excellent air quality**

Definition: The number of days with an air quality index (AQI) ≤ 100 as a percentage of the number of days in the year.

AQI is an abbreviation for air quality index. The AQI currently used in China is divided into six levels. I: 0≤AQI≤50, the air quality is excellent; II: 51≤AQI≤100, the air quality is good; III: 101≤AQI≤150, mild pollution is observed; IV: 151≤AQI≤200, IV, moderate pollution is observed; V: 201≤AQI≤300, V, heavy pollution is observed; VI: AQI＞300, VI, serious pollution is observed.

**HCI 2: PM2.5 concentration**

Definition: The amount of particulate matter with an aerodynamic equivalent diameter of 2.5 microns or less per cubic meter of ambient air, in μg/m3. If the value is high, then the air pollution is serious.

**HCI 3:** **Centralized treatment rate of sewage (%)**

Definition: The percentage of domestic sewage that has been treated at the secondary level by the sewage treatment plant and has reached the discharge standard.

The secondary treatment of sewage is a process in which the sewage is further processed via treatment with an aeration tank and a sedimentation tank with activated sludge after primary treatment.

**HCI 4:** **Eligible rate of drinking water quality (%)**

Definition: The percentage of water sample at which the quality of monitoring terminal water reaches the regular indices of the “Standards for drinking water quality.”

**HCI 5:** **Qualified rate of water quality in centralized drinking water sources (%)**

Definition: The proportion of quality centralized drinking water sources to the total number of water sources.

**HCI 6:** **Harmless disposal rate of household refuse (%)**

Definition: The ratio of the amount of harmless household refuse disposed to the total amount of urban household refuse.

**UHI 7: Per capita park greenbelt area (m2/person)**

Definition: Surface area of green space in parks in a built-up area, expressed in square meters per person.

**HCI 8:** **Density of Public toilet (seats/km2)**

Definition: The number of public toilets per unit area of the built-up area, by seats per square kilometer.

**HCI 9:** **Regional ambient noise (daytime/nighttime) (dB)**

Definition: The average value of ambient noise during daytime and nighttime in various urban areas.

**HCI 10: Urban road lighting rate (%)**

Definition: The proportion of urban main roads with lighting.

**HCI 11: Green coverage rate in built-up areas (%)**

Definition: The green coverage rate of the built-up area refers to the green coverage area in the built-up area of the city as a percentage of the total built-up area.
 The green coverage area refers to the vertical projected area of all kinds of vegetation, such as trees, shrubs, and lawns in the city. The built-up area refers to the non-agricultural production and construction area that has been developed through the expropriation of land and actual construction within the administrative area of the city. This area includes the part of the urban area that is concentrated and contiguous and is closely related to the city in the suburbs. Urban construction land includes those used for such facilities as airports, railway marshalling stations, sewage treatment plants, and communication stations.

**HCI 12: Vector density control level (%)**

Definition: The proportion of the main vector organisms, rats, mosquitoes, flies and cockroaches with a density control level of B and above.

**HCI 13: Coverage rate of basic endowment insurance (%)**

Definition: The ratio of the number of actual insured persons to the number of residents included in the basic endowment insurance coverage.

**HCI 14: Rate of medical insurance participation (%)**

Definition: The percentage of the people who actually participated in medical insurance compared with the total number of people who should participate in medical insurance.

**HCI 15: Civil medical assistance for the minimum living security crowd**

Definition:The number of people with minimum living security enjoying civil medical assistance.
**HCI 16: Employment rate of the disabled (%)**

Definition: The percentage of disabled people who are employed.

**HCI 17: Registered unemployment rate (%)**

Definition: At the end of the reporting period, the number of registered unemployed persons in urban areas accounted for the proportion of the total number of urban employees and registered unemployed persons.

The urban registered unemployment rate is an unemployment situation statistical indicator that is unique in China. Urban registered unemployed persons refer to urban inhabitants who are available and eligible for employment but are unemployed and register for unemployment in public employment service agencies within the working age (16 years old to retirement age).

**HCI 18: Coverage rate of accessibility facilities (%)**

Definition: The percentage of supporting service facilities in construction projects is covered.

Accessibility facilities refers facilities that people with disabilities, the elderly, children and other people with reduced mobility can access and use independently, safely and conveniently during residence, travel, work, recreation and other social activities.
**HCI 19: Sports ground area per capita (m2/person)**

Definition: Per capita area of sports ground area for inhabitants in the local built-up area., calculated in square meters per person. **HCI 20: Number of mass sports instructors per thousand people**

Definition: The number of mass sports instructors per 1,000 inhabitants.

A “Mass sports instructor” refers to those who do not receive remuneration for the purpose of providing the public with fitness skills, organizing fitness activities, publicizing scientific fitness knowledge, and other national fitness volunteer services and obtaining the technical title. China implements a technical hierarchy system for mass sports instructors. The technical grades are divided into four levels: third-level, second-level, first-level, and national mass sports instructors.

**HCI 21: Coverage rate of occupational health examination (%)**

Definition: The percentage of workers exposed to occupational disease hazards in key industries who have taken occupational health examinations compared with the total number of workers who should receive occupational health examinations.

**HCI 22: Occupational health monitoring rate of specially supervised enterprises (%)**

Definition: Percentage of enterprises that monitor the occupational hazards.

**HCI 23: Mortality of production safety accidents per 100 million GDP**

Definition: Number of deaths in production safety accidents, calculated per 100 million yuan.
**HCI 24: No major occupational disease hazards accidents and laboratory biosafety accidents in the past 3 years**

The major occupational disease hazards accidents: 10–50 with acute occupational diseases, ≤5 with acute occupational disease death, or≤5 with occupational anthrax.

**HCI 25: Food sampling inspection in four batches / a thousand people**

Definition: The number of food samples for sampling inspection per 1,000 inhabitants.

**HCI 26: No major food or drug safety accidents in the past 3 years**

Production safety accident disasters are generally divided into four levels according to their nature, severity, controllability and scope of influence: Grade I (special major), Grade II (major), Grade III (larger), and Grade IV (general).
 Grade I: An accident that causes more than 30 deaths, or more than 100 serious injuries, or direct economic losses of more than 100 million yuan.
 Grade II: An accident that causes more than 10 deaths of less than 30 persons, or serious injuries of more than 50 persons and 100 persons or less, or direct economic losses of more than 50 million yuan and less than 100 million yuan.
 Grade III: An accident that causes the death of more than 3 persons and less than 10 persons, or serious injury of more than 10 persons and 50 persons or less, or direct economic loss of 10 million yuan or more and 50 million yuan or less.
 Grade IV: An accident that causes the death of less than 3 persons, or serious injury of less than 10 persons, or direct economic loss of less than 10 million yuan.
**HCI 27: Passing rate of medical apparatus sampling inspection (%)**

Definition: Percentage of sampling medical device products that meet the requirements of management regulations related to medical device quality supervision sampling inspection.
**HCI 28: Passing rate of drug evaluative sampling inspection (%)**

Definition: Percentage of sampling drug that meets requirements of management regulations related to drug quality sampling inspection.
**HCI 29: Health certificate coverage rate of ready-to-eat foods practitioners (%)**

Definition: Percentage of ready-to-eat foods practitioners with health certificates.

**HCI 30: Qualified rate of National Student Physical Health Standard (%)**

Definition: Percentage of students reached National Student Physical Health Standard **HCI 31: Incidence of myopia (primary school/junior high school/high school) (%)**

Definition: The incidence of myopia disease among this specific population.

**HCI 32: Offering rate of health education course (compulsory education only) (%)**

Definition: The number of opened health education courses as a percentage of the total number of requested health education courses in middle and primary schools, respectively. **HCI 33: Number of old-age beds per 1,000 elderly people**

Definition: Number of beds for various types of aged care service agencies owned by each thousand elderly people, expressed in pieces/1,000 person. **HCI 34: Public transport mode share (%)**

Definition: The ratio of the number of trips by public transport (including regular public transport and rail transit) to the total trip volume among urban residents.

**HCI 35: Traffic accident rate per 10,000 vehicles**

Definition: The number of accidents per 10,000 vehicles annually.

The traffic accident rate shows the relationship between the number of traffic accidents or the number of casualties and deaths within a certain period/region in the country and the number of people, the number of registered (mobile) vehicles and the running mileage. In China, the numbers of accidents, injuries, and deaths, and the amount of direct economic losses are compared with the same period of the previous year, indicating the rise and fall of the accident rate.  **HCI 36: Road traffic injury mortality (%)**

Definition: The ratio of the number of people killed by traffic injuries to the average population of traffic-related injuries during the same period, expressed in ratio ×100,000/100,000. This indicator refers to the frequency of death from traffic injury.

**HCI 37: Per capita housing area (m2/person)**

Definition: The average residential housing area per person calculated by the resident population
**HCI 38: Number of general practitioners (person/10,000 people)**

Definition: The number of general practitioners per 10,000 inhabitants.
**HCI 39: Number of public health personnel (person/10,000 people)**

Definition: The total number of public health workers per 10,000 inhabitants.

**HCI 40: Number of registered nurses (person/10,000 people)**

Definition: The number of registered nurses per 10,000 inhabitants. **HCI 41: Number of Psychiatric Practitioners (assistant) (person/100,000 people)**

Definition: The number of Psychiatric Practitioners (Assistant) per 100,000 inhabitants. **HCI 42: Number of hospital beds in public traditional Chinese medicine hospitals (pieces/1,000 people)**

Definition: The number of beds in public traditional Chinese medicine hospitals, by per 1,000 inhabitants.

**HCI 43: Number of beds in medical institutions per thousand population (pieces/1,000 people)**

Definition: The number of beds in health care institutions per 1,000 inhabitants.

**HCI 44: Health expenditure accounting for the proportion of fiscal expenditure (%)**

Definition: Health care expenditure as a percentage of fiscal expenditure, which reflects the government's investment.
**HCI 45: The scale of the health service industry (trillion RMB)**

The health service industry mainly includes medical services, health management and promotion, health insurance and related services; it also involves supporting industries, such as medicines, medical equipment, health products, health foods, and fitness products.

**HCI 46: Filing rate of standardized Electronic Health Records (%)**

Definition: Percentage of inhabitants who have established standardized electronic health records in their jurisdiction.

**HCI 47: Systematic management rate of children (%)**

Definition: The number of children aged 0–6 who received one or more follow-ups in the annual jurisdiction accounted for the percentage of children aged 0–6 in the annual jurisdiction.
**HCI 48: Systematic management rate of pregnant women and parturient (%)**

Definition: The ratio of the number of pregnant women and parturient who received early pregnancy checkups, ≥5 times of prenatal checkups, sterilized delivery and postpartum visits from pregnancy to 28 days after delivery to the number of live births during the statistical year in the region.

**HCI 49: Health management rate of the elderly over 65 years old (%)**

Definition: The proportion of elderly people aged≥65 who received health management in the jurisdiction during the year.

The target population consists of the residents aged≥65 who live in the jurisdiction for more than half a year.

**HCI 50: Coverage rate of key population contract services (%)**

Definition: Percentage of key populations who contracted and received services

The key population includes elderly people, pregnant women, children, the disabled, and patients with chronic diseases and severe mental disorders

**HCI 51: Normative management rate of glycemic control (%)**

Definition: The number of diabetes patients who manage blood glucose according to the norm accounting for the percentage of the number of patients who are able to manage their diabetes during the year.

The target population is type 2 diabetes patients aged 35 years and over who are living in the area of jurisdiction.  **HCI 52: Normative management rate of blood pressure control (%)**

Definition: The number of hypertension patients who manage their blood pressure according to the norm accounting for the percentage of number of patients with hypertension who managed during the year.

The target population is hypertension patients aged 35 years and over in this jurisdiction.

**HCI 53: Management rate of HIV-infected individuals /AIDS patients (%)**

Definition: Taking the current address as the statistical caliber, this indicator refers to the proportion of infected individuals or patients who can be followed up. “Follow-up management” refers to a physical examination or at least one physical examination (CD4) test or an antiviral treatment in a year. **HCI 54: On-site standard disposal rate for sudden acute infectious diseases (%)**

Definition: Proportion of normatively disposed sudden acute infectious diseases. **HCI 55: Normative management rate of tuberculosis patients (%)**

Definition: The number of patients with standardized management of tuberculosis accounting for the percentage of tuberculosis patients diagnosed by the superior medical institutions in the same period and notified to the primary health institutions.

**HCI 56: Inoculation rate of immunization planning target population (%)**

Definition: The proportion of inoculated target people according to immunization planning.

“Immunization planning” refers to the planning and strategies formulated for the prevention of vaccination of susceptible populations using effective vaccines in accordance with national infectious disease prevention and control plans.

**HCI 57: Normative management rate of patients with severe mental disorders (%)**

Definition: The number of patients diagnosed with severe mental disorders who have been managed annually according to regulatory requirements accounting for the proportion of all registered patients with severe mental disorders.

“Severe mental disorder” refers to a group of mental illnesses with clinical manifestations of psychotic symptoms, such as hallucinations, delusions, serious thinking disorders, behavioral disorders, and severely impaired social life.

**HCI 58: Life expectancy**

Definition: The mean number of years expected to survive for the registered population 0-year-old.

**HCI 59: Mortality of pregnant woman and parturient (1/100,000)**

Definition: Pregnant and parturient women who died of various causes from the beginning of pregnancy to 42 days after birth accounting for the proportion of live births per 100,000 births during the same period. **HCI 60: Infant mortality (‰)**

Definition: The ratio of the number of deaths of a child who is under 1 year of age to the total number of live births during the same period; the value is expressed per 1,000 live births.

**HCI 61: Mortality of children under 5 years old (‰)**

Definition: The probability that a child born in a given year will die before the age of 5 years, expressed per 1,000 live births. **HCI 62: Incidence of birth defect (%)**

Definition: The ratio of the number of birth defects to the total number of births in the current year, expressed as a percentage.

**HCI 63: Low birth weight rate (%)**

Definition: Number of live births weighing less than 2,500 g as a percentage of the total number of live births in this jurisdiction.
**HCI 64: Reported incidence of notifiable infectious diseases (1/100,000)**

Definition: The proportion of notifiable infectious diseases in a given area within a certain year per 100,000 people.

The “Infectious Diseases Prevention and Control Law of the People's Republic of China” stipulates that the infectious diseases are classified into three categories: Classes A, B, and C. At present, 39 legal infectious diseases are recognized, including 2 types of infectious diseases, 26 types of infectious diseases, and 11 types of infectious diseases.
**HCI 65: Incidence of tuberculosis (%)**

Definition: The number of new tuberculosis patients as a percentage of the total number of people. **HCI 66: Premature mortality of main noncommunicable diseases (%)**

Definition: The probability of death in people aged 30–70 years due to cardio-cerebral vascular diseases, cancer, chronic respiratory diseases and diabetes, expressed as a percentage.

**HCI 67: Prevalence of hypertension in adults (%)**

Definition: The number of people with hypertension among the inhabitants over 18 years old accounted for the total number of people in this jurisdiction.

**HCI 68: Trends in the incidence of tumor**

Definition: The changing trends of tumor incidence in recent years. **HCI 69: Trends in the incidence of** **cardio-cerebral vascular events**

**Definition:** The changing trends of cardio-cerebral vascular events incidence in recent years.

Cardio-cerebral vascular events are acute idiopathic diseases caused by cardiovascular and cerebral vascular diseases caused by risk factors, including the following: stroke (cerebral infarction, subarachnoid hemorrhage, cerebral hemorrhage), myocardial infarction (acute myocardial infarction, the sudden death of coronary heart disease, old myocardial infarction), etc. In China, the “Chinese Resident Chronic Disease and Nutrition Monitoring Work Program” and “National Noninfectious Chronic Diseases Comprehensive Prevention and Control Demonstration Zone Work Guidance Program” clearly state that monitoring cardio-cerebral vascular events is necessary. Furthermore, a dedicated report system for monitoring cardio-cerebral vascular events exists.  **HCI 70: Prevalence of obesity (adults/children) (%)**

Definition: Adults with a body mass index (BMI) greater than or equal to 28. For children, the target population is 6- to 18- year-old school children and adolescents in the jurisdiction, whose obesity is based on the criteria of “Screening for Overweight and Obesity among School-age Children and Adolescents.”

**HCI 71: Health literacy level (%)**

Definition: The proportion of residents with basic health literacy to all other residents. A general Chinese Health Literacy Scale is used to assess the health literacy level. Since 2008, China has conducted annual national health literacy surveys.

**HCI 72: Smoking rate (by gender) (%)**

Definition: The proportion of smokers in the sample survey population (15 years and older) to the total number of respondents. **HCI 73: Proportion of people who regularly participate in physical exercise (%)**

Definition: The proportion of people who regularly participate in physical exercise in the sample survey population to the total number of residents.

“Regular physical exercise” means participating in physical exercise activities no less than three times a week, no less than 30 min each time, and moderate exercise intensity. **Characteristic HCI 1: Number of large-scale (national and above) national fitness activities held each year**

The pilot urban area is in charge of the Chongqing International Marathon, so we selected this indicator as one characteristic indicator of the pilot district.

**Characteristic HCI 2: Health science popularization**

Definition: Number of people pooled by health science popularizations **Characteristic HCI 3: Construction of health venues**

Definition: The number of public sports venues in this jurisdiction.

The public sports venues are sites for public sports activities; they are managed by sports departments and are open to the public free of charge.
